# Supplementary material for: The Histone Variant H3.3 Is Enriched at Drosophila Amplicon Origins but Does Not Mark Them for Activation
Source: PubMed Central journal article supplement (PMC4889662; doi:10.1534/g3.116.028068), 2016-04-06
Supplement: supp_g3.116.028068_TableS1.pdf [file supp_g3.116.028068_TableS1.pdf]

**TABLE S1: *p*-values for H3.3A-GFP occupancy in stage 10 (S10) follicle cells**

| LOCUS <sup>c</sup>     | <i>p</i> -value                            |                                           |
|------------------------|--------------------------------------------|-------------------------------------------|
|                        | S10 at locus<br>vs<br>control <sup>a</sup> | <i>p</i> -value significance <sup>b</sup> |
| DAFC-66D – ACE -10     | .0903                                      | ns                                        |
| DAFC-66D - a           | .0078                                      | **                                        |
| DAFC-66D – ACE3        | .0009                                      | ***                                       |
| DAFC-66D - d           | .0007                                      | ***                                       |
| DAFC-66D - ori $\beta$ | .0053                                      | **                                        |
| DAFC-66D - g           | .0008                                      | ***                                       |
| DAFC-66D – ACE +10     | .0009                                      | ***                                       |
| DAFC-7F                | .0006                                      | ***                                       |
| DAFC-22B               | .0021                                      | **                                        |
| DAFC-30B               | .0121                                      | *                                         |
| DAFC-34B               | .0125                                      | *                                         |
| DAFC-62D               | .0082                                      | **                                        |
| hsp70                  | .0016                                      | **                                        |

a: The enrichment of H3.3A-GFP (as measured by % input) at the DAFCs was compared to its average enrichment at two negative control loci - 93E/F and 64A by Ratio Paired *t*-test.

b: not significant (ns),  $p > 0.05$ ; \*,  $p \leq 0.05$ , \*\*  $p \leq 0.01$ ; \*\*\*  $p \leq 0.001$

c. Refer to Table S4 for primer locations.
