# Supplementary material for: The Histone Variant H3.3 Is Enriched at Drosophila Amplicon Origins but Does Not Mark Them for Activation
Source: PubMed Central journal article supplement (PMC4889662; doi:10.1534/g3.116.028068), 2016-04-06
Supplement: supp_g3.116.028068_TableS2.pdf [file supp_g3.116.028068_TableS2.pdf]

**TABLE S2: *p*-values for the difference in H3.3A-GFP occupancy with or without expression of the CDK inhibitor Dap in stage 10 (S10) follicle cells**

| LOCUS <sup>c</sup> | p value S10 at locus<br>in presence vs absence of Dap <sup>a</sup> | <i>p</i> -value significance <sup>b</sup> |
|--------------------|--------------------------------------------------------------------|-------------------------------------------|
| DAFC-66D - ACE -10 | .3213                                                              | ns                                        |
| DAFC-66D - a       | .6016                                                              | ns                                        |
| DAFC-66D – ACE3    | .7591                                                              | ns                                        |
| DAFC-66D - d       | .8109                                                              | ns                                        |
| DAFC-66D - ori β   | .8348                                                              | ns                                        |
| DAFC-66D - g       | .7364                                                              | ns                                        |
| DAFC-66D - ACE +10 | .5827                                                              | ns                                        |
| DAFC-7F            | .0514                                                              | ns                                        |
| DAFC-22B           | .7732                                                              | ns                                        |
| DAFC-30B           | .9587                                                              | ns                                        |
| DAFC-34B           | .7393                                                              | ns                                        |
| DAFC-62D           | .0410                                                              | *                                         |
| hsp70              | .2140                                                              | ns                                        |

a: Difference in enrichment of H3.3A-GFP (measured as % input) in stage 10 follicle cells was compared in the presence or absence of CDK inhibitor –Dap, by Ratio Paired *t*-test.

b: not significant (ns),  $p > 0.05$ ; \*,  $p \leq 0.05$

c. Refer to Table S4 for primer locations.
