# Supplementary material for: The Histone Variant H3.3 Is Enriched at Drosophila Amplicon Origins but Does Not Mark Them for Activation
Source: PubMed Central journal article supplement (PMC4889662; doi:10.1534/g3.116.028068), 2016-04-06
Supplement: supp_g3.116.028068_TableS3.pdf [file supp_g3.116.028068_TableS3.pdf]

**TABLE S3: *p*-values for H3.3A-GFP occupancy in stages 1-8 (S1-8) and stage 10 (S10) follicle cells**

| LOCUS <sup>d</sup> | <i>p</i> -value S1-8 at locus |                                              | <i>p</i> -value S1-8 at locus |                                              |
|--------------------|-------------------------------|----------------------------------------------|-------------------------------|----------------------------------------------|
|                    | vs                            |                                              | vs                            |                                              |
|                    | S1-8 control                  |                                              | S10 at locus                  |                                              |
|                    | <i>p</i> -value <sup>a</sup>  | <i>p</i> -value<br>significance <sup>c</sup> | <i>p</i> -value <sup>b</sup>  | <i>p</i> -value<br>significance <sup>c</sup> |
| DAFC-66D - ACE -10 | .4509                         | ns                                           | .5724                         | ns                                           |
| DAFC-66D - a       | .0118                         | *                                            | .754                          | ns                                           |
| DAFC-66D - ACE3    | .0316                         | *                                            | .0295                         | *                                            |
| DAFC-66D - d       | .0255                         | *                                            | .0481                         | *                                            |
| DAFC-66D - ori β   | .0403                         | *                                            | .2371                         | ns                                           |
| DAFC-66D - g       | .0281                         | *                                            | 0.0165                        | *                                            |
| DAFC-66D - ACE +10 | 0.1574                        | ns                                           | .036                          | *                                            |
| DAFC-7F            | .1345                         | ns                                           | .0056                         | **                                           |
| DAFC-22B           | .0221                         | *                                            | .2045                         | ns                                           |
| DAFC-30B           | .404                          | ns                                           | .09                           | ns                                           |
| DAFC-34B           | .4961                         | ns                                           | .037                          | *                                            |
| DAFC-62D           | .6255                         | ns                                           | .0017                         | **                                           |
| hsp70              | .123                          | ns                                           | .1235                         | ns                                           |

a: The enrichment of H3.3A-GFP (as measured by % input) in stage 1-8 at the DAFCs was compared to its average enrichment at two negative control loci - 93E/F and 64A by Ratio Paired *t*-test.

b. Difference in enrichment of H3.3A-GFP (measured as % input) in stage 1-8 vs stage 10 follicle cells by Ratio Paired *t*-test.

c: not significant (ns),  $p > 0.05$ ; \*  $p \leq 0.05$ , \*\*  $p \leq 0.01$ ; \*\*\*  $p \leq 0.001$

d. Refer to Table S4 for primer locations.
