# Supplementary material for: The Histone Variant H3.3 Is Enriched at Drosophila Amplicon Origins but Does Not Mark Them for Activation
Source: PubMed Central journal article supplement (PMC4889662; doi:10.1534/g3.116.028068), 2016-04-06
Supplement: supp_g3.116.028068_TableS4.pdf [file supp_g3.116.028068_TableS4.pdf]

**TABLE S4: Location of ChIP-qPCR primers.**

| Primer name  | Primer Genomic Location <sup>a</sup> |
|--------------|--------------------------------------|
| ACE -10      | 3L: 8,715,901..8,716,007             |
| DAFC-66D - a | 3L: 8,725,294..8,725,393             |
| ACE3         | 3L: 8,726,272..8,726,394             |
| DAFC-66D - d | 3L: 8,727,155..8,727,274             |
| ori- $\beta$ | 3L: 8,728,136..8,728,249             |
| DAFC-66D - d | 3L: 8,729,741..8,729,825             |
| ACE +10      | 3L: 8,736,262..8,736,368             |
| DAFC- 22B    | 2L: 1,912,760..1,912,875             |
| DAFC- 30B    | 2L: 9,544,399..9,544,491             |
| DAFC- 34B    | 2L: 13,415,375..13,415,442           |
| DAFC- 62D    | 3L: 2,272,717.. 2,272,790            |
| DAFC- 7F     | X: 8,482,316.. 8,482,431             |
| 64A          | 3L: 3,985,754..3,985,831             |
| 93E/F        | 3R: 21,695,975..21,696,058           |
| hsp70        | 3R: 12,467,727..12,467,806           |

a: Coordinates for the primer pairs are based on *Drosophila melanogaster* reference genome Dmel\_Release\_6.09 (Flybase version FB2016\_01)
